# The American Society of Anesthesiologists Postoperative Visual Loss Registry

## Analysis of 93 Spine Surgery Cases with Postoperative Visual Loss

Lorri A. Lee, M.D.,\* Steven Roth, M.D.,† Karen L. Posner, Ph.D.,‡ Frederick W. Cheney, M.D.,§ Robert A. Caplan, M.D.,|| Nancy J. Newman, M.D.,# Karen B. Domino, M.D., M.P.H.\*\*

**CME** This article and its accompanying editorial have been selected for the *Anesthesiology* CME Program. After reading both articles, go to <http://www.asahq.org/journal-cme> to take the test and apply for Category 1 credit. Complete instructions may be found in the CME section at the back of this issue.

**Background:** Postoperative visual loss after prone spine surgery is increasingly reported in association with ischemic optic neuropathy, but its etiology is unknown.

**Methods:** To describe the clinical characteristics of these patients, the authors analyzed a retrospectively collected series of 93 spine surgery cases voluntarily submitted to the American Society of Anesthesiologists Postoperative Visual Loss Registry on standardized data forms.

**Results:** Ischemic optic neuropathy was associated with 83 of 93 spine surgery cases. The mean age of the patients was  $50 \pm 14$  yr, and most patients were relatively healthy. Mayfield pins supported the head in 16 of 83 cases. The mean anesthetic duration was  $9.8 \pm 3.1$  h, and the median estimated blood loss was 2.0 l (range, 0.1–25 l). Bilateral disease was present in 55 patients, with complete visual loss in the affected eye(s) in 47. Ischemic optic neuropathy cases had significantly higher anesthetic duration, blood loss, percentage of patients in Mayfield pins, and percentage of patients with bilateral disease compared with the remaining 10 cases of visual loss diagnosed with central retinal artery occlusion ( $P < 0.05$ ), suggesting they are of different etiology.

**Conclusions:** Ischemic optic neuropathy was the most common cause of visual loss after spine surgery in the Registry, and most patients were relatively healthy. Blood loss of 1,000 ml or greater or anesthetic duration of 6 h or longer was present in 96% of these cases. For patients undergoing lengthy spine surgery in the prone position, the risk of visual loss should be considered in the preoperative discussion with patients.

This article is accompanied by an Editorial View. Please see: Warner MA: Postoperative visual loss: Experts, data, and practice. *ANESTHESIOLOGY* 2006; 105:641-2

\* Associate Professor, \*\* Professor, Departments of Anesthesiology and Neurological Surgery (Adjunct), ‡ Research Associate Professor, Departments of Anesthesiology and Anthropology (Adjunct), § Professor and Chair, Department of Anesthesiology, University of Washington. † Associate Professor, Department of Anesthesia and Critical Care, University of Chicago, Chicago, Illinois. || Clinical Professor, Department of Anesthesiology, University of Washington, Staff Anesthesiologist, Virginia Mason Medical Center, Seattle, Washington # Professor, Departments of Ophthalmology, Neurology, and Neurological Surgery, Emory University, Atlanta, Georgia.

Received from the Department of Anesthesiology, University of Washington, Seattle, Washington. Submitted for publication January 6, 2006. Accepted for publication March 24, 2006. Supported by the American Society of Anesthesiologists, Park Ridge, Illinois. All opinions expressed are those of the authors and do not reflect the policy of the American Society of Anesthesiologists.

Address correspondence to Dr. Lee: Department of Anesthesiology, Harborview Medical Center, Box 359724, 325 Ninth Avenue, Seattle, Washington 98104. [lorlee@u.washington.edu](mailto:lorlee@u.washington.edu). Individual article reprints may be accessed at no charge through the Journal Web site, [www.anesthesiology.org](http://www.anesthesiology.org).

†† Providers' Packet for Physicians Completing Case Report Forms. Available at: [www.asaclosedclaims.org](http://www.asaclosedclaims.org) or <http://depts.washington.edu/asaccp/eye/providers/packet.pdf>. Accessed October 26, 2005.

POSTOPERATIVE visual loss (POVL) is a relatively uncommon but devastating complication that is most often associated with cardiac, spine, and head and neck operations. Estimates for spine and cardiac surgery are as high as 0.2%<sup>1</sup> and 4.5%,<sup>2</sup> respectively. During the mid-1990s, hospital risk managers, anesthesiologists, ophthalmologists, and surgeons voiced concern that POVL seemed to be increasing, particularly for spine surgery.<sup>1,3,4</sup> Most of the ophthalmologic lesions were caused by ischemic optic neuropathy (ION) and were not consistent with an etiology of globe compression. ION more commonly occurs spontaneously and has been associated with atherosclerotic risk factors,<sup>5</sup> with adverse effects of antihypertensive medications,<sup>6</sup> and, more recently, with sildenafil.<sup>7</sup> The unexpected occurrence and serious nature of ION after nonocular surgery warranted further investigation of patient characteristics and perioperative events.

Because the number of POVL cases from a single institution is very low, a multi-institutional database is required to obtain sufficient numbers for meaningful analysis of common perioperative characteristics or events. In response to this problem, the American Society of Anesthesiologists (ASA) Committee on Professional Liability established the ASA POVL Registry in 1999 to collect detailed information on cases of POVL occurring after nonocular surgery. This report provides an in-depth analysis of 93 cases associated with spine surgery from the ASA POVL Registry. Patient characteristics and perioperative anesthetic and surgical events are described.

## Materials and Methods

### Study Population

After approval by the Institutional Review Board at the University of Washington (Seattle, Washington), voluntary enrollment of POVL cases by physicians occurring within 7 days after nonocular surgery began in 1999. Cases were submitted on a detailed data collection form available from the University of Washington or from the ASA Closed Claims Project.†† All data were de-identified with respect to patient, physicians, and institutions.

### *Patient and Perioperative Characteristics*

Information collected included patient demographics, medical history including the presence of risk factors for vascular disease (obesity, hypertension, coronary artery disease/myocardial infarction, cerebrovascular disease, diabetes, hypercholesterolemia, and tobacco history), current medications, and surgical history. Intraoperative information included procedure description, number of levels fused and/or instrumented, type of headrest and surgical frame, patient position on frame, and frequency of eye checks. Durations of anesthetic, surgery, and prone positioning were recorded. Type of anesthetic, drugs, and fluids administered preoperatively and intraoperatively were included. Estimated blood loss (EBL) and type of blood products administered were obtained along with preoperative and lowest hemoglobin/hematocrit values, and urine output. Use of deliberate hypotension and specific hypotensive agents were noted.

Intraoperative blood pressure was recorded as absolute mean arterial blood pressure and/or systolic blood pressure (SBP) and percentage below baseline. Data were collected for blood pressure values 20%, 40%, 50%, and more than 50% below baseline values. Blood pressure values were entered only if the blood pressure decreased within a predefined range of values for a minimum of 15 consecutive or nonconsecutive minutes. Presence of hypothermia (temperature  $< 35^{\circ}\text{C}$  for a minimum of 30 min) was noted, as were any adverse intraoperative events including cardiogenic shock, cardiac arrest, seizures, and direct trauma to the eye.

### *Ophthalmologic Examination Characteristics and Diagnostic Criteria*

Detailed information on the ophthalmologic examination for each eye was obtained including type of visual deficit (*i.e.*, decreased visual acuity, visual field deficit, or complete loss of vision), time when visual symptoms were first noted, funduscopy examination, and ophthalmologic diagnosis. Classification of the specific lesion was based on ophthalmologic diagnosis or, if unavailable, findings consistent with standard diagnostic criteria. For central retinal artery occlusion (CRAO), these criteria included a pale ischemic retina with a pathognomonic cherry-red spot at the macula and a relative afferent pupillary defect or reduced pupillary light reflex. A diagnosis of anterior ischemic optic neuropathy (AION) required an early funduscopy examination demonstrating an edematous disc with or without peripapillary flame-shaped hemorrhages and a relative afferent pupillary defect or reduced pupillary light reflex. Criteria consistent with posterior ischemic optic neuropathy (PION) included a normal early funduscopy examination with a relative afferent pupillary defect or an absent pupillary light reflex. Eventual optic nerve pallor was consistent with both AION and PION. Lack of an early funduscopy examination before the appearance of iso-

lated optic nerve pallor was categorized as unspecified ION.

Any treatment and prognosis for recovery of vision was noted, but duration of follow-up varied from initial examination to 4 yr postoperatively. Finally, a summary of events was provided by the physician submitting the case, including any related diagnostic workup (*e.g.*, visual evoked potentials, magnetic resonance imaging or computed tomography of the head and orbits, carotid duplex).

Inclusion criteria for this analysis included any POVL case associated with spine surgery from the ASA POVL Registry with the diagnosis of CRAO, AION, PION, or unspecified ION. Two coauthors (L.A.L. and K.L.P.) reviewed all data forms, and other coauthors (S.R. and N.J.N.) were consulted to resolve a question of appropriate ophthalmologic diagnosis.

### *Statistical Analysis*

Reliability of data were tested by comparing duplicate submissions ( $n = 13$ ) from separate individuals. The  $\kappa$  statistic was acceptable for all categorical variables tested (0.40–0.55 for hypertension, percentage below baseline blood pressure, and recovery of vision; 0.75–1.0 for sex, diabetes, smoking, coronary artery disease, previous myocardial infarction, obesity, instrumentation/fusion, unilateral or bilateral disease, periocular trauma, and loss of vision). However, confidence intervals were wide because of the small sample size. Continuous variables (age, anesthesia duration, EBL, intravenous fluid administration, number of vertebral levels, lowest SBP, and total number of coexisting diseases) all had high intraclass correlation coefficients (0.798–0.999) with narrow confidence intervals, indicating excellent agreement of data submitted by different individuals. Each pair of duplicate submissions was entered only once in the Registry.

Differences between ION and CRAO cases and between AION and PION cases were analyzed using the Student *t* test with  $P \leq 0.05$  considered statistically significant. Median and range were reported as descriptive statistics when distributions were nonnormal, with comparison by Mann-Whitney U test. Differences in proportions were compared using the Z test.

## **Results**

As of June 2005, 93 cases of POVL associated with spine surgery were entered into the ASA POVL Registry that met inclusion criteria, out of a total 131 cases (72%). Other cases included 2 spine cases that did not meet inclusion criteria, 12 cardiac cases, 6 major vascular cases (3 aortic, 2 peripheral vascular, 1 carotid endarterectomy), 5 orthopedic cases, and 13 miscellaneous cases.

**Table 1. ASA POVL Registry: Ophthalmic Lesion Associated with POVL after Spine Surgery (n = 93)**

| Ophthalmic Lesion | Cases, n<br>(% of 93) | No Light Perception,<br>n (% this lesion – row %) |
|-------------------|-----------------------|---------------------------------------------------|
| ION               | 83 (89)               | 47 (57)                                           |
| PION              | 56 (60)               | 34 (61)                                           |
| AION              | 19 (20)               | 8 (42)                                            |
| ION unspecified   | 8 (9)                 | 5 (63)                                            |
| CRAO              | 10 (11)               | 7 (70)                                            |

ASA = American Society of Anesthesiologists; AION = anterior ischemic optic neuropathy; CRAO = central retinal artery occlusion; ION = ischemic optic neuropathy; PION = posterior ischemic optic neuropathy; POVL = Postoperative Visual Loss.

Ischemic optic neuropathy was the cause of visual loss in 83 (89%) of these 93 cases, of which 56 were diagnosed with PION, 19 were diagnosed with AION, and 8 were diagnosed with unspecified ION (table 1). Thirty-one cases occurred before 1999, when the ASA POVL Registry was initiated. There were no statistically significant differences between AION and PION cases with respect to demographics, coexisting diseases, surgical characteristics, or anesthetic management (data not shown). Because of the lack of these differences between AION and PION cases, the difficulty in distinguishing AION from PION (particularly in the absence of an early ophthalmologic examination), and the uncertainty whether AION and PION occurring after spine surgery are different disease states with separate etiologies, all AION, PION, and unspecified ION cases were combined under the ION group for comparison with CRAO cases. CRAO accounted for the remaining 10 POVL cases.

#### *Demographics and Coexisting Diseases of Spine Surgery Cases with ION*

Operations for the 83 spine cases with ION occurred between 1987 and 2004. There were significantly more males than females (72% *vs.* 28%;  $P < 0.05$ ), and the mean age was  $50 \pm 14$  yr (range, 16–73 yr; table 2). Most patients were relatively healthy (64% ASA physical status I or II), and 96% were undergoing elective surgery. Coexisting diseases, including hypertension, diabetes, tobacco use, coronary artery disease, cerebrovascular disease, increased cholesterol/lipids, and obesity, were present in 4–53% of cases (table 2). At least one of these conditions was present in 82% of cases ( $n = 68$ ; table 2). Of the 41% of hypertensive patients, 13 used  $\beta$ -blockers, 11 used angiotensin-converting enzyme inhibitors or angiotensin-converting enzyme receptor antagonists, 11 used calcium channel blockers, 11 used diuretics, and 5 used other or unknown medications. No patient had a preoperative history of glaucoma.

#### *Description of Operations and Positioning of Spine Surgery Cases with ION*

The surgical procedure for most of the spine cases with ION (89%) involved fusion and/or instrumentation

**Table 2. ASA POVL Registry Spine Cases with ION: Patient Characteristics (n = 83)**

| Demographics                 | n (% of 83 cases) |
|------------------------------|-------------------|
| Age, mean (SD), yr           | $50 \pm 14$       |
| Male                         | 60 (72)           |
| ASA I or II                  | 53 (64)           |
| ASA III                      | 24 (29)           |
| ASA IV                       | 2 (2)             |
| Emergency                    | 3 (4)             |
| Coexisting diseases          |                   |
| Hypertension                 | 34 (41)           |
| Diabetes                     | 13 (16)           |
| Tobacco use                  | 38 (46)           |
| Coronary artery disease      | 8 (10)            |
| Cerebrovascular disease      | 3 (4)             |
| Increased cholesterol/lipids | 11 (13)           |
| Obesity                      | 44 (53)           |
| $\geq 1$ Coexisting diseases | 68 (82)           |

American Society of Anesthesiologists (ASA) physical status data do not add up to 100% because of missing data in four cases.

ION = ischemic optic neuropathy; POVL = Postoperative Visual Loss.

on more than one vertebral level in the thoracic, lumbar, or sacral spine (table 3). Approximately one third (39%) of patients had undergone previous spine surgery. All of the patients were positioned prone for a portion of the procedure, except two anterior spine procedures. Ten procedures involved supine/lateral and prone positioning (*i.e.*, anterior-posterior operations). The Wilson frame, Jackson table, and soft chest rolls were used in similar proportions (table 4). Headrests used most commonly were foam pads, Mayfield pins, and donut/gel pads (table 4). Eye checks were documented by the anesthesiologist in 42 cases (51%).

#### *Anesthetic Management of Spine Surgery Cases with ION*

General anesthesia was used uniformly with a combination of volatile and narcotic (89%), total intravenous

**Table 3. ASA POVL Registry: Surgical Characteristics in Spine Cases with ION (n = 83)**

| Surgical Variable          | n (% of 83 cases) |
|----------------------------|-------------------|
| Fusion/instrumentation     | 74 (89)           |
| Previous spine surgery     | 32 (39)           |
| Number of vertebral levels |                   |
| 1                          | 9 (11)            |
| 2                          | 19 (23)           |
| 3                          | 15 (18)           |
| $\geq 4$                   | 30 (36)           |
| Unknown number of levels   | 10 (12)           |
| Vertebral location         |                   |
| Cervical/cervicothoracic   | 4 (5)             |
| Thoracic/thoracolumbar     | 11 (13)           |
| Lumbar                     | 22 (27)           |
| Lumbosacral/sacral         | 35 (42)           |
| Thoracolumbosacral         | 5 (6)             |
| Unknown location           | 6 (7)             |

ASA = American Society of Anesthesiologists; ION = ischemic optic neuropathy; POVL = Postoperative Visual Loss.



**Table 4. ASA POVL Registry: Type of Surgical Frames, Tables, and Headrests in Spine Cases with ION (n = 83)**

|                                 | n (% of 83 cases) |
|---------------------------------|-------------------|
| Type of surgical frame or table |                   |
| Wilson frame                    | 25 (30)           |
| Jackson spinal table            | 22 (27)           |
| Soft chest rolls                | 17 (20)           |
| Knee-chest tables               | 7 (8)             |
| Other/unknown tables            | 12 (14)           |
| Type of headrest                |                   |
| Foam pad                        | 47 (57)           |
| Mayfield pins                   | 16 (19)           |
| Donut/gel pad                   | 7 (8)             |
| Other/unknown                   | 13 (16)           |

ASA = American Society of Anesthesiologists; ION = ischemic optic neuropathy; POVL = Postoperative Visual Loss.

anesthesia with propofol and narcotic (2%), and unknown general anesthetic agents (8%). All of the commonly utilized volatile anesthetics (isoflurane [59%], sevoflurane [14%], and desflurane [22%]) and nitrous oxide (29%) were administered.

The mean anesthetic duration was  $9.8 \pm 3.1$  h (table 5), and 94% of cases were 6 h or longer (fig. 1). The mean prone position duration was  $7.7 \pm 3.1$  h. The median EBL was 2.0 l (range, 0.1–25 l; table 5), and 82% of cases had an EBL of 1.0 l or greater (fig. 2). Fluid management varied, with colloid (hydroxyethyl starch or albumin) used in 30% of cases and a mean intravenous crystalloid replacement of  $9.7 \pm 4.7$  l (table 5). Blood was replaced with cell saver (54%), packed erythrocytes (57%), and whole blood (11%). The lowest hematocrit (mean) was  $26 \pm 5\%$  (table 5), and 17% of cases had a nadir hematocrit of 30% or greater. Urine output was less than  $0.5 \text{ ml} \cdot \text{kg}^{-1} \cdot \text{h}^{-1}$  in 24% of cases, with postoperative increased creatinine in six cases and rhabdomyolysis in three.

Blood pressure varied widely for both absolute SBP values and percent below baseline blood pressure. In 33% of cases, the lowest SBPs were greater than 90

mmHg, whereas 20% had the lowest SBP 80 mmHg or less (table 6). In 6% of cases, the lowest mean arterial blood pressure or SBPs were less than 20% below baseline, whereas 34% of cases had the lowest mean arterial pressure or SBP 40% or greater below baseline (table 6). Deliberate hypotension was used in 27% of cases (table 6). Agents most commonly used for deliberate hypotension were labetalol or esmolol ( $n = 10$ ) and volatile agents ( $n = 5$ ). Phenylephrine ( $\geq 1$  mg total dose) was administered in 27% of cases. Hypothermia was present in 10% of cases.

#### *Ophthalmologic Findings for Spine Surgery Cases with ION*

Of the 83 patients with ION, 55 (66%) had documented bilateral involvement, for a total of 138 affected eyes (table 5). The median onset time of reporting visual loss postoperatively was 15 h (range, 0–168 h), with the exception of one patient who was mechanically ventilated for 2 weeks postoperatively and reported complete blindness 2 days after extubation. Full or partial eye opening was noted immediately postoperatively in 43 patients, inability to open one or both eyes was noted in 12 patients, and eye opening information was missing in 28 patients. There was associated periocular trauma in only one case (table 5). Visual fields were restricted in 134 of 138 affected eyes (97%), and complete blindness with loss of light perception occurred in 64 of 138 affected eyes (47 patients). PION was diagnosed in 67% of all ION cases, AION was diagnosed in 23% of cases, and unspecified ION was diagnosed in 10% of cases (table 1). There was some degree of recovery of vision in 42% of ION cases (table 5), although improvement in vision was often clinically insignificant (e.g., light/dark perception to hand motion only). Follow-up of ophthalmologic examinations was inconsistent and varied from only the initial examination to 4 yr postoperatively.

#### *Spine Surgery Cases with CRAO (n = 10)*

The mean age for the 10 patients with CRAO was  $46 \pm 13$  yr (table 5). Horseshoe headrests were used in 3 cases, foam pads were used in 2, and miscellaneous headrests were used in 5. Mayfield pins were not used for any CRAO cases, in contrast to 19% of ION cases ( $P = 0.001$ ). Eye checks were performed in 6 of 10 cases at intervals ranging from 30 min to only once during a 10-h case. Eye checks were not performed in 3 cases (missing data in 1 case). The mean anesthetic duration and median EBL were significantly less in the CRAO compared with the ION group ( $P = 0.002$  and  $0.001$ , respectively; table 5). The mean lowest hematocrit was higher in the CRAO than in ION cases, although not significantly different ( $P = 0.075$ ; table 5). Deliberate hypotension was used in 4 of 10 CRAO cases. In contrast to the ION group, there were no cases of bilateral CRAO ( $P = 0.001$ ). Recovery of vision between CRAO and ION

#### **Anesthesia Duration in Spine ION Cases (n=83)**

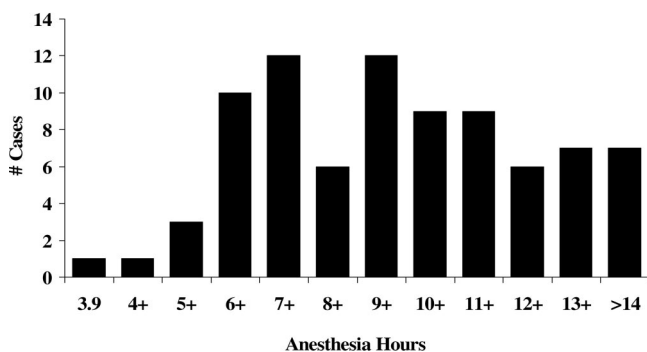

**Fig. 1. Anesthetic duration for 83 spine cases associated with ischemic optic neuropathy (ION). The majority of cases (94%) were 6 h or longer in duration.**

**Table 5. Comparison of ION and CRAO Cases from the ASA POVl Registry (n = 93)**

|                                                              | ION (n = 83) | CRAO (n = 10)  | P Value |
|--------------------------------------------------------------|--------------|----------------|---------|
| Age, mean (SD), yr                                           | 50 (14)      | 46 (13)        | 0.34*   |
| Anesthetic duration, mean (SD), h                            | 9.8 (3.1)    | 6.5 (2.2)      | 0.002*  |
| Estimated blood loss, median (range), l                      | 2.0 (0.1–25) | 0.75 (0.5–1.8) | 0.001†  |
| Crystalloid infusion, mean (SD), l                           | 9.7 (4.7)    | 4.6 (1.7)      | 0.001*  |
| Lowest hematocrit, mean (SD)                                 | 26 (5)       | 31 (6)         | 0.075*  |
| Bilateral disease, number of cases (% of column)             | 55 (66)      | 0 (0)          | 0.001‡  |
| Any visual recovery, number of cases (% of column)           | 35 (42)      | 2 (20)         | 0.11‡   |
| Mayfield pins, number of cases (% of column)                 | 16 (19)      | 0 (0)          | 0.001‡  |
| Ipsilateral periocular trauma, number of cases (% of column) | 1 (1)        | 7 (70)         | 0.001‡  |

\* t test. † Mann-Whitney U test. ‡ Z test.

ASA = American Society of Anesthesiologists; CRAO = central retinal artery occlusion; ION = ischemic optic neuropathy; POVl = Postoperative Visual Loss.

groups was not significantly different ( $P = 0.11$ ). Periocular trauma was documented in 7 of 10 CRAO cases compared with 1 of 83 ION cases ( $P = 0.001$ ; table 5) and included ipsilateral findings of decreased supraorbital sensation, ophthalmoplegia, corneal abrasion, ptosis, or unilateral erythema.

## Discussion

The ASA POVl Registry was created because prospective data collection on this low-incidence complication was impractical. It is unclear how the preponderance of spine surgery cases in this analysis relates to the actual proportion of all POVl cases because the ASA POVl Registry lacks denominator data. Incidence of any POVl injury cannot be ascertained. Reporting bias from direct participation in the case and error from retrospective data collection are possible, especially for cases occurring before the start of the Registry in 1999, when information from the medical records may have been more difficult to obtain. Further, the accuracy of the data cannot be verified in these anonymous case submissions. However, data for this analysis were obtained from medical records, and of the 13 cases of duplicate submissions

by separate individuals, the  $\kappa$  scores and intraclass correlation coefficients were all acceptable, validating the accuracy of reporting. The perceived increase in POVl in association with spine surgery may be related to multiple factors, including increased awareness of the problem, increased rates of spinal fusion operations over the past decade,<sup>8</sup> or other variables. Our database cannot test these suggestions in a rigorous manner.

The etiology of ION remains unknown, and the majority of the literature on perioperative ION after spine surgery is based on case reports, reviews of case reports, and retrospective studies.<sup>1,3,4,9–11</sup> This analysis of the ASA POVl Registry is the largest, and most detailed to date, of patients with ION after spine surgery (n = 83). The demographics of these patients demonstrate a predominately middle-aged, relatively healthy population, which may reflect the greater than 200% increase in spinal fusion rates in the 1990s for older adults.<sup>8</sup> The finding of 72% male patients in this database is striking given that the National Inpatient Sample data for 1999

**Table 6. ASA POVl Registry: Lowest Blood Pressure\* in Spine Cases with ION (n = 83)**

|                                             | n (% of 83 cases) |
|---------------------------------------------|-------------------|
| Lowest SBP, mmHg                            |                   |
| > 110                                       | 4 (5)             |
| 101–110                                     | 7 (8)             |
| 91–100                                      | 17 (20)           |
| 81–90                                       | 35 (42)           |
| 71–80                                       | 12 (14)           |
| ≤ 70                                        | 5 (6)             |
| Unknown                                     | 3 (4)             |
| Lowest MAP or SBP as % below baseline, mmHg |                   |
| < 20%                                       | 5 (6)             |
| 20–39%                                      | 47 (57)           |
| 40–49%                                      | 21 (25)           |
| ≥ 50%                                       | 7 (8)             |
| Unknown                                     | 3 (4)             |
| Deliberate hypotension                      | 22 (27)           |

\* Blood pressure ranges were based on 15 min of blood pressure at a given range.

ASA = American Society of Anesthesiologists; ION = ischemic optic neuropathy; MAP = mean arterial pressure; POVl = Postoperative Visual Loss; SBP = systolic blood pressure.

## Estimated Blood Loss in Spine Cases with ION (n=83)

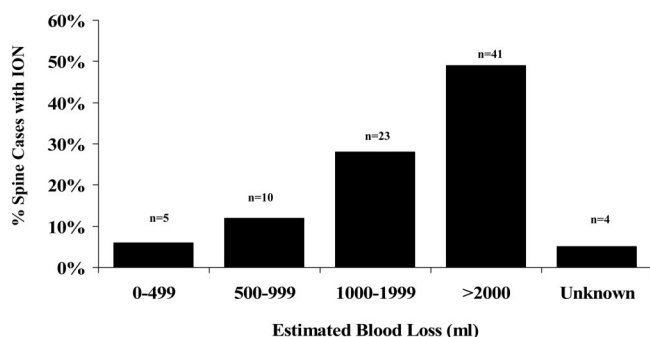

**Fig. 2. Estimated blood loss for 83 spine cases associated with ischemic optic neuropathy (ION). In the majority of cases (82%), blood loss was 1,000 ml or greater.**

spinal fusion procedures ( $n = 188,309$ ) demonstrates a 48% male:52% female ratio.<sup>‡‡</sup> The influence of sex on ulnar nerve injuries has also been documented in the same proportion (70% male).<sup>12</sup> Previous studies on ulnar neuropathy have suggested that anatomical differences predispose men to this injury, but hormonal differences may be equally as important. Experimental animal models of cerebral ischemia have demonstrated a protective effect of estrogen, and this may contribute to the lower proportion of women with both ulnar and optic nerve injuries.<sup>13</sup>

Although there are few children or teenagers who developed perioperative ION, young age did not render patients immune to this complication. Moreover, one retrospective study from a single institution included two 13-yr-old patients who developed PION after spine surgery.<sup>11</sup> Older patients may be more vulnerable to these injuries than younger patients because there is a natural reduction in optic nerve fibers of approximately 5,000 axon loss per year of life, compared with the 0.8–1.2 million fibers in early childhood.<sup>14,15</sup> However, the occurrence of this complication in teenagers, and in patients with relatively few vascular risk factors, suggests that “normal” anatomical or physiologic variation in the optic nerve blood supply between individuals may place some patients more at risk for this devastating complication than others. Consequently, preoperative identification of patients at high risk for developing ION after spine surgery is not currently possible based on specific patient characteristics or coexisting diseases.

The occurrence of ION in 16 patients whose heads were placed in Mayfield pins with the eyes free of pressure clearly demonstrates that ION occurs in the absence of pressure on the globe. These findings are consistent with the lack of retinal ischemia on ophthalmologic examination in ION. Moreover, the occurrence of ION in both eyes in the majority of cases is more consistent with a systemic etiology, rather than globe compression that usually affects only one eye. The 10 patients with CRAO, a lesion that is known to result from globe compression, all had unilateral disease usually associated with ipsilateral periocular trauma and demonstrated significantly shorter anesthetic durations and lower EBL. Although specialized ophthalmologists have long known that pressure on the globe does not result in isolated ION,<sup>16</sup> these findings provide more convincing evidence to patients, surgeons, and anesthesiologists.

Blood pressure management for the 83 spine cases with ION varied widely, with blood pressure decrements anywhere from less than 20% of baseline ( $n = 5$ ) to 50% of baseline or greater ( $n = 7$ ). The relatively high proportion of cases (27%) using deliberate hypotension reflects a long-standing clinical practice of decreasing

blood pressure to reduce blood loss during major spine surgery.<sup>17</sup> This technique has not been previously associated with POVl after spine surgery in prospective or retrospective studies on deliberate hypotension,<sup>18,19</sup> although studies with adequate power to detect this infrequent complication are lacking. Autoregulation of blood flow in the cerebral circulation has been well demonstrated in humans, albeit with a high degree of variability in the lower limit of autoregulation (mean arterial pressure  $< 57$  to  $91$  mmHg).<sup>20,21</sup> It is not clear whether the optic nerve in humans also has the ability to autoregulate in both anterior and posterior regions.<sup>22–24</sup> The occurrence of ION in many cases without apparent hypotension makes the role of blood pressure management unclear. The case-control study by Myers *et al.*<sup>4</sup> of spine patients with POVl did not show any difference in lowest blood pressure between patients who developed visual loss from any lesion (ION, CRAO, and cortical blindness) and those who did not. Future case-control studies of only patients with ION after spine surgery may help to determine whether certain blood pressure reductions are associated with an increased risk of developing this complication.

Whether the finding of moderate anemia in the majority of these cases is a result of the fact that these were predominately major spine procedures with large blood losses, or whether anemia contributes to the development of ION, cannot be discerned by this study. The finding of ION in a patient with a nadir hematocrit of 40% demonstrates that ION occurs in the absence of anemia. Of the 83 spine surgery patients with ION, 14 cases (17%) occurred with a nadir hematocrit of 30% or greater. The effects of hemodilution on the blood flow and oxygen delivery to the optic nerve have not been well studied in either animals or humans.

Of note, two interrelated factors regarding the surgical procedure were common to most cases. EBL of 1,000 ml or greater occurred in 82% of cases, and anesthetic duration of 6 h or longer was present in 94%. One of these two factors was present in all but three ION cases. Myers *et al.*<sup>4</sup> also found that long duration and large EBL were associated with POVl after spine surgery, but their data combined all causes of POVl, including ION, CRAO, and cortical blindness. Although there is not yet enough information to confirm a relation between surgical duration, magnitude of blood loss, and the risk of POVl, there is an opportunity for further clinical study. This could be accomplished by comparing outcomes in conventional single-stage surgery to outcomes in staged surgery. Such a study would require considerations of the added costs of staged surgery and the potential for increased risks from perioperative complications such as infection, pneumonia, and deep venous thrombosis.

The ASA POVl Registry does not allow us to establish a definite etiology for perioperative ION, but it is noteworthy that 72% of all ION cases in the Registry were

‡‡ National and Regional Statistics from the National Inpatient Sample. Available at: <http://hcup.ahrq.gov/HcupNet.asp>. Accessed February 15, 2006



associated with spine surgery in the prone position. This observation is consistent with the hypothesis that the venous pressure within the optic nerve may become increased during prone surgery, perhaps due to venous engorgement. The plausibility of this hypothesis is supported by the observation that intraocular pressure increases when awake and anesthetized patients are placed in the prone position.<sup>25-27</sup> Blood flow in the posterior optic nerve may be particularly susceptible to increased venous pressure because the arterial vessels that supply the posterior optic nerve are small end-vessels from the surrounding pia.<sup>28</sup> Further support for this hypothesis comes from case reports of ION that have occurred in patients with increased venous and intracranial pressure after radical neck operations with bilateral internal jugular vein ligation.<sup>29,30</sup> These reports suggest that high venous pressure and interstitial tissue edema may compromise blood flow in the optic nerve. Histopathologic studies of PION in one patient with severe blood loss and in two patients after bilateral radical neck dissection demonstrated central hemorrhagic infarctions several millimeters posterior to the lamina cribrosa to several millimeters anterior to the optic nerve canal—an area supplied by the small pial vessels.<sup>31-33</sup> A related hypothesis is that ION is a “compartment syndrome of the optic nerve” created by increased venous pressure and interstitial fluid accumulation within the relatively nondistensible space of either the semirigid lamina cribrosa at the optic nerve head or the bony optic canal. Proponents of this hypothesis have frequently recommended a head-up body position and colloid-based fluid resuscitation in prone spine surgery to decrease the potential interstitial edema around the optic nerve. Body position could not be reliably discerned from these cases. However, the use of colloid in 30% of these ION cases and in many case reports and case series suggests that its role in prevention of ION remains undetermined.<sup>1,9</sup>

It is notable that ION almost always occurred without any accompanying evidence of vascular injury in other critical organs, such as the heart or brain, even in patients with preexisting coronary atherosclerosis, diabetes, and hypertension. This observation suggests that the optic nerve vasculature may be uniquely vulnerable to hemodynamic perturbations in the prone position in some patients.

In summary, more than two thirds of the cases in the ASA POVL Registry were related to spine surgery in the prone position, and 89% of these cases were associated with ION. Most spine surgery patients with ION were relatively healthy and had a wide range of nadir hematocrits and blood pressure management that may reflect a multifactorial etiology. EBL of 1,000 ml or greater or anesthetic duration of 6 h or longer was present in 96% of these cases. For patients undergoing lengthy spine surgery in the prone position, the risk of visual loss

should be considered in the discussion of perioperative risks.

The authors thank Nayak L. Polissar, Ph.D. (Mountain-Whisper-Light Statistical Consulting, Seattle, Washington), for his paid consultation for the statistical analysis of agreement of data between duplicate submissions. The authors thank Lynn Akerlund for her contributions as project coordinator and for her secretarial assistance, and John Campos, M.A., for technical assistance with creation and maintenance of the database. They are members of the Closed Claims Project research staff in the Department of Anesthesiology, University of Washington, Seattle, Washington. The authors also thank the physicians and patients who submitted cases to the American Society of Anesthesiologists Postoperative Visual Loss Registry for their dedication to furthering research in this area.

## References

1. Stevens WR, Glazer PA, Kelley SD, Lietman TM, Bradford DS: Ophthalmic complications after spinal surgery. *Spine* 1997; 22:1319-24
2. Shaw PJ, Bates D, Cartledge NE, Heaviside D, French JM, Julian DG, Shaw DA: Neuro-ophthalmological complications of coronary artery bypass graft surgery. *Acta Neurol Scand* 1987; 76:1-7
3. Katz DM, Trobe JD, Cornblath WT, Kline LB: Ischemic optic neuropathy after lumbar spine surgery. *Arch Ophthalmol* 1994; 112:925-31
4. Myers MA, Hamilton SR, Bogosian AJ, Smith CH, Wagner TA: Visual loss as a complication of spine surgery: A review of 37 cases. *Spine* 1997; 22:1325-9
5. Anonymous: Characteristics of patients with nonarteritic anterior ischemic optic neuropathy eligible for the Ischemic Optic Neuropathy Decompression Trial. *Arch Ophthalmol* 1996; 114:1366-74
6. Hayreh SS, Zimmerman MB, Podhajsky P, Alward WL: Nocturnal arterial hypotension and its role in optic nerve head and ocular ischemic disorders. *Am J Ophthalmol* 1994; 117:603-64
7. Pomeranz HD, Bhavsar AR: Nonarteritic ischemic optic neuropathy developing soon after use of sildenafil (Viagra): A report of seven new cases. *J Neuroophthalmol* 2005; 25:9-13
8. Deyo RA, Gray DT, Kreuter W, Mirza S, Martin BI: United States trends in lumbar fusion surgery for degenerative conditions. *Spine* 2005; 30:1441-5
9. Ho VT, Newman NJ, Song S, Ksiazek S, Roth S: Ischemic optic neuropathy following spine surgery. *J Neurosurg Anesthesiol* 2005; 17:38-44
10. Buono LM, Foroozan R: Perioperative posterior ischemic optic neuropathy: Review of the literature. *Surv Ophthalmol* 2005; 50:15-26
11. Chang SH, Miller NR: The incidence of vision loss due to perioperative ischemic optic neuropathy associated with spine surgery: The Johns Hopkins Hospital Experience. *Spine* 2005; 30:1299-302
12. Warner MA, Warner ME, Martin JT: Ulnar neuropathy: Incidence, outcome, and risk factors in sedated or anesthetized patients. *ANESTHESIOLOGY* 1994; 81:1332-40
13. Jover T, Tanaka H, Calderone A, Oguro K, Bennett MV, Etgen AM, Zukin RS: Estrogen protects against global ischemia-induced neuronal death and prevents activation of apoptotic signaling cascades in the hippocampal CA1. *J Neurosci* 2002; 22:2115-24
14. Balazsi AG, Rootman J, Drance SM, Schulzer M, Douglas GR: The effect of age on the nerve fiber population of the human optic nerve. *Am J Ophthalmol* 1984; 97:760-6
15. Mikelberg FS, Drance SM, Schulzer M, Yidegilligne HM, Weis MM: The normal human optic nerve: Axon count and axon diameter distribution. *Ophthalmology* 1989; 96:1325-8
16. Hollenhorst RW, Svien HJ, Benoit CF: Unilateral blindness occurring during anesthesia for neurosurgical operations. *AMA Arch Opth* 1954; 52:819-80
17. McNeill TW, DeWald RL, Kuo KN, Bennett EJ, Salem MR: Controlled hypotensive anesthesia in scoliosis surgery. *J Bone Joint Surg Am* 1974; 56:1167-72
18. Malcolm-Smith NA, McMaster MJ: The use of induced hypotension to control bleeding during posterior fusion for scoliosis. *J Bone Joint Surg Br* 1983; 65:255-8
19. Patel NJ, Patel BS, Paskin S, Laufer S: Induced moderate hypotensive anesthesia for spinal fusion and Harrington-rod instrumentation. *J Bone Joint Surg Am* 1985; 67:1384-7
20. Larsen FS, Olsen KS, Hansen BA, Paulson OB, Knudsen GM: Transcranial Doppler is valid for determination of the lower limit of cerebral blood flow autoregulation. *Stroke* 1994; 25:1985-8
21. Drummond JC: The lower limit of autoregulation: time to revise our thinking? *ANESTHESIOLOGY* 1997; 86:1431-3
22. Pillunat LE, Anderson DR, Knighton RW, Joos KM, Feuer WJ: Autoregulation of human optic nerve head circulation in response to increased intraocular pressure. *Exp Eye Res* 1997; 64:737-44
23. Nitta A, Kimura Y, Takayama H: The blood flow in post-laminar optic nerve in monkeys was dependent on intraocular pressure level. *Nippon Ganka Gakkai Zasshi* 1989; 93:206-14
24. Weinstein JM, Duckrow RB, Beard D, Brennan RW: Regional optic nerve blood flow and its autoregulation. *Invest Ophthalmol Vis Sci* 1983; 24:1559-65

25. Lam AK, Douthwaite WA: Does the change of anterior chamber depth or/and episcleral venous pressure cause intraocular pressure change in postural variation? *Optom Vis Sci* 1997; 74:664-7
26. Cheng MA, Todorov A, Tempelhoff R, McHugh T, Crowder CM, Laurysen C: The effect of prone positioning on intraocular pressure in anesthetized patients. *ANESTHESIOLOGY* 2001; 95:1351-5
27. Ozcan MS, Praetel C, Bhatti MT, Gravenstein N, Mahla ME, Seubert CN: The effect of body inclination during prone positioning on intraocular pressure in awake volunteers: A comparison of two operating tables. *Anesth Analg* 2004; 99:1152-8
28. Hayreh SS: The blood supply of the optic nerve head and the evaluation of it: Myth and reality. *Prog Retin Eye Res* 2001; 20:563-93
29. Pazos GA, Leonard DW, Blice J, Thompson DH: Blindness after bilateral neck dissection: Case report and review. *Am J Otolaryngol* 1999; 20:340-5
30. Weiss KL, Wax MK, Haydon RC 3rd, Kaufman HH, Hurst MK: Intracranial pressure changes during bilateral radical neck dissections. *Head Neck* 1993; 15:546-52
31. Johnson MW, Kincaid MC, Trobe JD: Bilateral retrobulbar optic nerve infarctions after blood loss and hypotension: A clinicopathologic case study. *Ophthalmology* 1987; 94:1577-84
32. Marks SC, Jaques DA, Hirata RM, Saunders JR Jr: Blindness following bilateral radical neck dissection. *Head Neck* 1990; 12:342-5
33. Nawa Y, Jaques JD, Miller NR, Palermo RA, Green WR: Bilateral posterior optic neuropathy after bilateral radical neck dissection and hypotension. *Graefes Arch Clin Exp Ophthalmol* 1992; 230:301-8
